# Supplementary material for: Characterization of Cross-Species Transmission of Drosophila melanogaster Nora Virus
Source: MDPI journal article supplement (doi:10.3390/life12111913), 2022-11-17
Supplement: s1 [file s1]

**Supplemental Table S1.** Nora virus infection of *Drosophila* species and other laboratory-reared insects. Each biological replicate consists of 10 individuals that have been pooled together.

| Organism               | Biological Replicate | Percent positive |
|------------------------|----------------------|------------------|
| <i>D. melanogaster</i> | 3                    | 100%             |
| <i>D. yakuba</i>       | 3                    | 100%             |
| <i>D. mercatorum</i>   | 3                    | 67%              |
| <i>M. domestica</i>    | 3                    | 0%               |
| <i>G. sigillatus</i>   | 3                    | 67%              |
| <i>G. mellonella</i>   | 3                    | 100%             |
| <i>T. molitor</i>      | 3                    | 67%              |
